# Supplementary material for: Inverse kinetic isotope effect of ammonia decomposition over Ru/CeO2 using deuterated ammonia
Source: Royal Society of Chemistry journal article supplement (doi:10.1039/d4cc02372b), 2024-01-01
Supplement: d4cc02372b1.pdf [file d4cc02372b1.pdf]

## Supporting information

### Inverse kinetic isotope effect of ammonia decomposition over Ru/CeO<sub>2</sub> using deuterated ammonia

Takuya Suguro, Fuminao Kishimoto, Sota Kuramoto,\* William J. Movick, and Kazuhiro Takanabe\*

Department of Chemical System Engineering, School of Engineering, The University of Tokyo

7-3-1 Hongo, Bunkyo-ku, Tokyo, Japan

E-mail: [kfuminao@chemsys.t.u-tokyo.ac.jp](mailto:kfuminao@chemsys.t.u-tokyo.ac.jp); [takanabe@chemsys.t.u-tokyo.ac.jp](mailto:takanabe@chemsys.t.u-tokyo.ac.jp)

## Experimental section

### Catalyst Preparation

Cerium oxide ([CeO<sub>2</sub>] Daiichi Kigenso Kagaku Kogyo, >99.0 %) were heated at 500 °C for 4 h in static air prior to use. After the heat treatment, wetness impregnation was performed. In a typical synthetic procedure, 500 mg of support materials was first placed in a glass beaker with a stir bar. After this step, 55 mg g of Ru<sub>3</sub>(CO)<sub>12</sub> (Sigma Aldrich, 99 %) dissolved in 5 mL of tetrahydrofuran (Wako, 99.5 %) was added to the beaker and stirred at 400 rpm at room temperature. After 1 h of stirring, the beaker was heated at 80 °C until all tetrahydrofuran evaporated (typically 1 h). Next, the dried sample was moved to an alumina boat and placed in a tubular furnace. Ar (JFP, 99.9999 %) flowed at 50 mL min<sup>-1</sup> in the tubular furnace while the sample was heated to 350 °C for 5 h with a ramp rate of 3 °C min<sup>-1</sup>. Samples were then cooled to room temperature, and air was slowly diffused into the furnace to avoid overoxidation. Samples were labeled as 5 wt% Ru/CeO<sub>2</sub>. The catalysts were diluted and used by physical mixing of x times of the supports as appropriate to control the reaction rate. The TEM image of the catalyst was taken by JEOL, JEM-2010F.

### Ammonia decomposition reaction

The samples were prepared by pelletizing, crushing, and sieving to a particle diameter of 250–500 μm prior to conducting activity measurements. The catalyst bed suspended by quartz wool was placed in a quartz tube with an internal diameter of 4 mm and heated with an electric furnace. The temperature of the cylindrical catalyst bed was measured using a thermocouple located outside the quartz tube at the catalyst bed. The four-way valve allows switching between a flow reactor and a recirculating batch reactor. The sample was pretreated under an H<sub>2</sub> (JFP, 99.99999 %) flow of 60 mL min<sup>-1</sup> for 2 h at 400°C and 0.1 MPa, before being set to the measurement temperature and stabilized under reaction conditions for at least 30 min using 10 mL min<sup>-1</sup> NH<sub>3</sub> (JFP, 99.9999 %) and 90 mL min<sup>-1</sup> Ar in the flow system.

In the Flow reaction, 0.5% NH<sub>3</sub> (diluted with argon) was introduced at flow rates of 25, 50, and 100 mL min<sup>-1</sup>. After waiting 30 min for stabilization, NH<sub>3</sub> concentration was measured by the area of IR spectra using a Fourier-transform infrared spectrometer (Shimadzu, IRAffinity-1S). The area of the IR spectrum in the range of 3325 to 3342 cm<sup>-1</sup> was determined, and the concentration of NH<sub>3</sub> was calculated using the calibration curve.

In the recirculation batch reaction, the composition of H<sub>2</sub>, N<sub>2</sub> (JFP, 99.99995 %), NH<sub>3</sub> and Ar was adjusted to achieve various partial pressures of H<sub>2</sub>, N<sub>2</sub>, NH<sub>3</sub> and Ar under total flow rate of 200

mL min<sup>-1</sup> to try to achieve gradient-less conditions inside the 81 mL closed circulation system. The quartz tube with the catalyst bed was connected to a gas cell, pump, and four way valve, as shown in Fig. 1. After waiting 30 min for stabilization, the four-way valve was switched to start the ammonia decomposition reaction as a recirculation batch reactor. NH<sub>3</sub> concentration was measured in the same way as for the flow reaction. The rates of each condition shown in Figs. 2-4 were obtained by the slope of the decrease in ammonia up to 10% conversion of the reaction and the lines (if any) show the fitting curves of the plot.

### Derivation of equilibrium constants for D<sub>2</sub> chemisorption

The equilibrium constant can be expressed in the formalism of statistical mechanics as follows.

$$K = \frac{\prod_j q_p^{v_j}}{\prod_i q_r^{v_i}} \quad (1)$$

where  $q_r$  and  $q_p$  are the partition functions for reactants and products, and  $v_i$  and  $v_j$  the stoichiometric coefficients for reactant  $i$  and product  $j$ . In most cases, the largest part of the isotope effect results from a change in the ground-state vibrational frequency.

The isotope effect of the equilibrium constant for D/H chemisorption in Eq. (7) in the main text can be expressed as follows, assuming that the adsorbed atoms are not mobile and the degree of freedom is 3.<sup>1</sup>

$$\frac{K_{7,D}}{K_{7,H}} = \left( \frac{m_{H_2}}{m_{D_2}} \right)^{5/2} \exp \left\{ \left[ -2 \sum_{i=1}^3 (v_i^D - v_i^H) + (v_1^{D_2} - v_1^{H_2}) \right] h / (2kT) \right\} \quad (2)$$

where  $m_{H_2}$  and  $m_{D_2}$  are the masses of H<sub>2</sub> and D<sub>2</sub>,  $v_i^H$  and  $v_i^D$  are the vibrational frequencies for adsorbed H and D atoms, and  $v_1^{H_2}$  and  $v_1^{D_2}$  are the vibrational frequencies for gaseous H<sub>2</sub> and D<sub>2</sub>, and  $h$  is Planck's constant,  $k$  is Boltzmann's constant, and  $T$  is temperature.

Applying the values in Table S1,  $\frac{K_{7,D}}{K_{7,H}}$  is below 1 between 180°C to 270°C. It has been claimed

that the ratio of equilibrium constants for D/H chemisorption is less than 1 on Pt<sup>2</sup>, Ni<sup>3</sup>, and Ru<sup>1</sup>.

Table S1. Vibrational Frequencies for Molecular and Atomically Adsorbed H<sub>2</sub> and D<sub>2</sub>.<sup>4</sup>

| Species        | Mode                   | Frequency / cm <sup>-1</sup> |
|----------------|------------------------|------------------------------|
| H <sub>2</sub> | $\nu(\text{H-H})$      | 4161                         |
| D <sub>2</sub> | $\nu(\text{D-D})$      | 2933                         |
| M-H            | $\nu(\text{M-H})$      | 2250–1700                    |
|                | $\delta(\text{M-H})^a$ | 800–600                      |
| M-D            | $\nu(\text{M-D})$      | 1591–1202                    |
|                | $\delta(\text{M-D})^a$ | 566–424                      |

<sup>a</sup> Doubly generate.

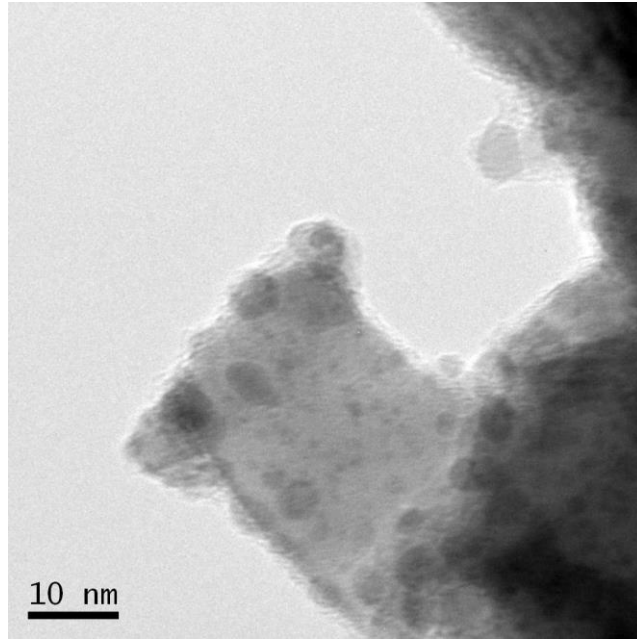

**Figure S1.** TEM image of 5wt% Ru/CeO<sub>2</sub>.

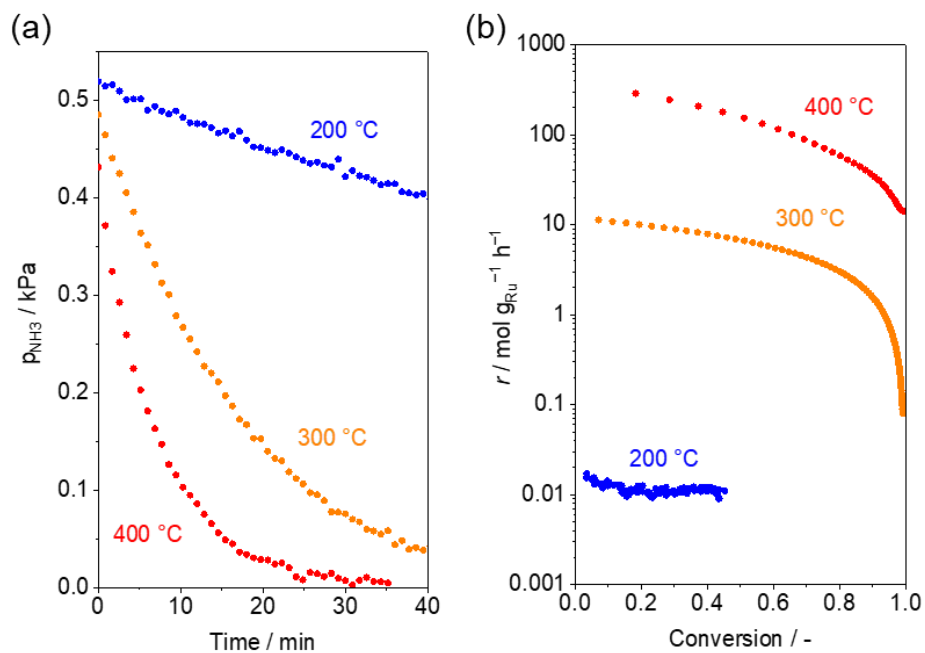

**Figure S2.** (a) Typical results of NH<sub>3</sub> decomposition in the recirculation batch system and (b) rate as a function of conversion plots. Catalyst: 0.1 mg of 5 wt% Ru/CeO<sub>2</sub> diluted with 9.9 mg of CeO<sub>2</sub> for 200 and 300 °C and 10× further dilution for 400 °C reaction within the pellets. Initial conditions: ~0.5 kPa NH<sub>3</sub> balanced with Ar, total 101 kPa. Absolute pressure of NH<sub>3</sub> was calculated from IR peak area. Pretreatment at 400 °C under H<sub>2</sub>.

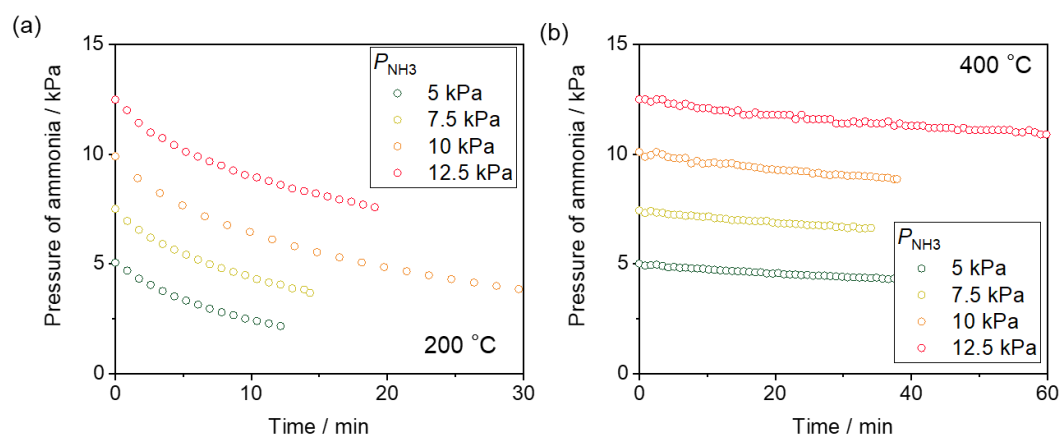

**Figure S3.** Time course measurement of NH<sub>3</sub> decomposition at various initial NH<sub>3</sub> pressures over supported Ru/CeO<sub>2</sub> at (a) 200°C (loaded Ru amount: 25 mg) and (b) 400°C (loaded Ru amount: 50 ng). The measurements were conducted in the recirculation batch reactor. The initial total pressure was balanced with Ar to 101 kPa.

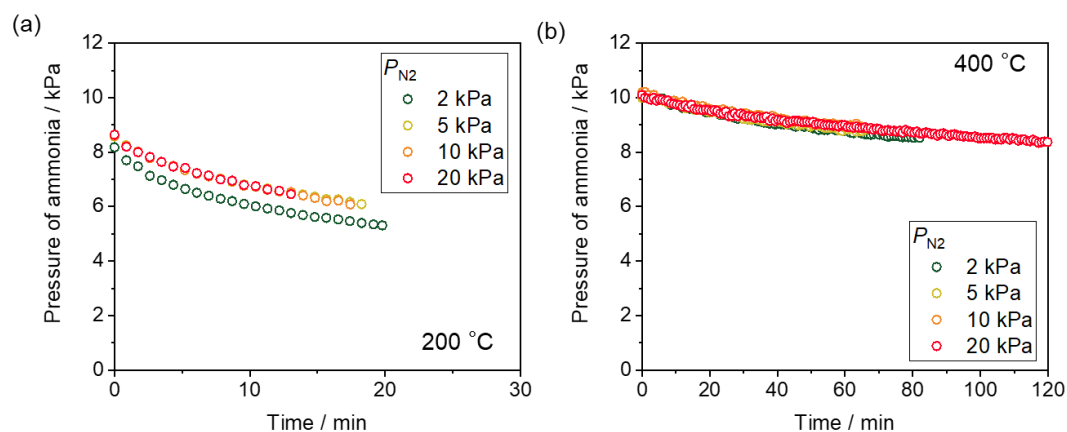

**Figure S4.** Time course measurement of  $NH_3$  decomposition at various initial  $N_2$  pressures over supported  $Ru/CeO_2$  at (a) 200°C (loaded  $Ru$  amount: 25 mg) and (b) 400°C (loaded  $Ru$  amount: 50 ng). The measurements were conducted in the recirculation batch reactor. The initial pressure of  $NH_3$  was  $\sim 10$  kPa and total pressure was balanced with  $Ar$  to 101 kPa.

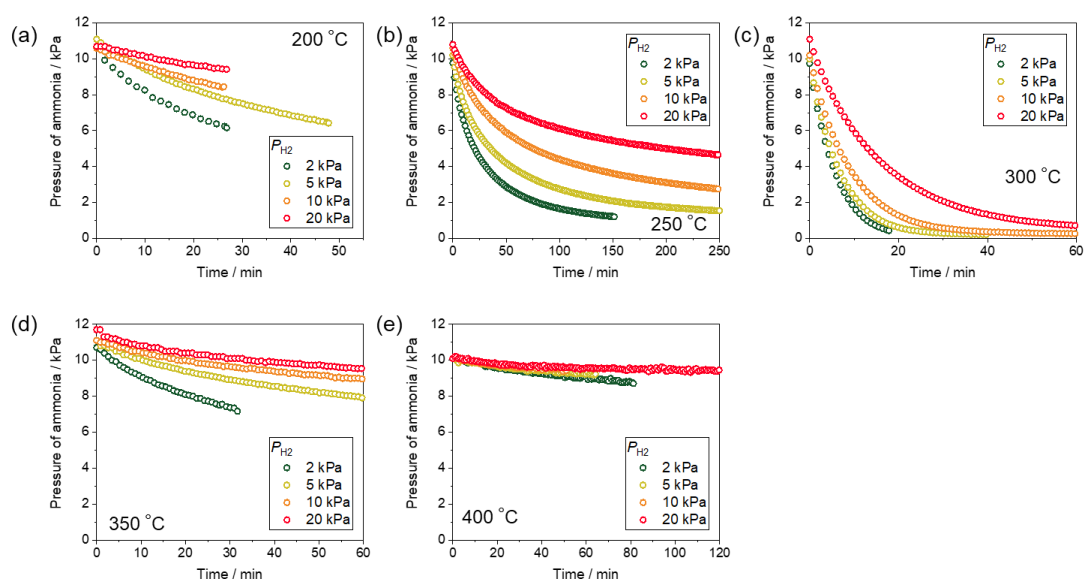

**Figure S5.** Time course measurement of  $NH_3$  decomposition at various initial  $H_2$  pressures over supported  $Ru/CeO_2$  at (a) 200°C (loaded  $Ru$  amount: 0.5 mg), (b) 250°C (loaded  $Ru$  amount: 0.025 mg), (c) 300°C (loaded  $Ru$  amount: 5  $\mu g$ ), (d) 350°C, (loaded  $Ru$  amount: 0.25  $\mu g$ ) (e) 400°C (loaded  $Ru$  amount: 50 ng). The measurements were conducted in the recirculation batch reactor. The initial pressure of  $NH_3$  was  $\sim 10$  kPa and total pressure was balanced with  $Ar$  to 101 kPa.



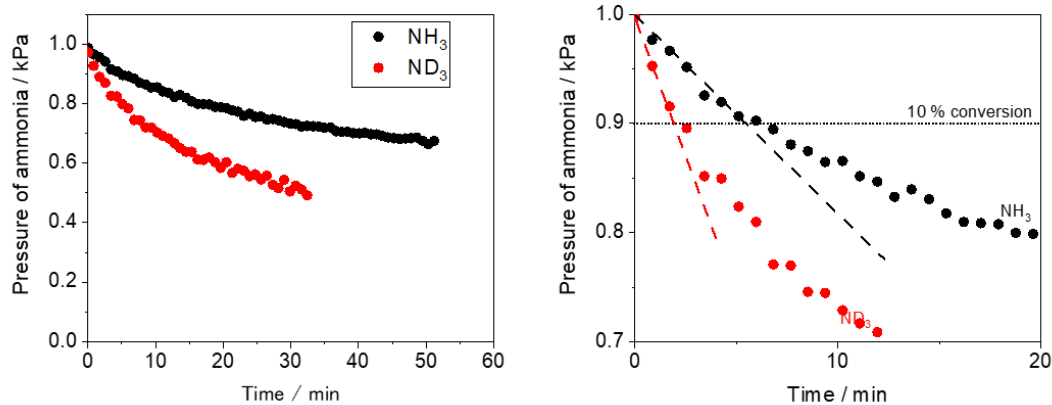

**Figure S6.** Time course measurement of  $\text{NH}_3$  (black circle) and  $\text{ND}_3$  (red line) decomposition at  $200^\circ\text{C}$  over supported  $\text{Ru}/\text{CeO}_2$  (loaded  $\text{Ru}$  amount:  $0.5\text{ mg}$ ). The measurements were conducted in the recirculation batch reactor. The initial ratio of gas was  $\text{Ar}:\text{NH}_3 = 100:1\text{ kPa}$  or  $\text{Ar}:\text{ND}_3 = 100:1\text{ kPa}$ . The reaction rate was calculated from the slope of the change in ammonia concentration until a conversion of  $10\%$  was reached as shown in the right panel.

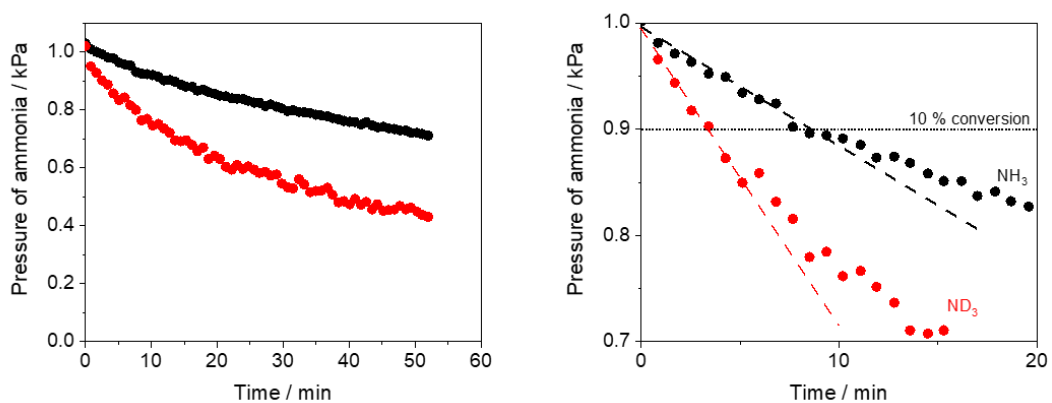

**Figure S7.** Time course measurement of  $\text{NH}_3$  (black circle) and  $\text{ND}_3$  (red line) decomposition at  $250^\circ\text{C}$  over supported  $\text{Ru}/\text{CeO}_2$  (loaded  $\text{Ru}$  amount:  $0.025\text{ mg}$ ). The measurements were conducted in the recirculation batch reactor. The initial ratio of gas was  $\text{Ar}:\text{NH}_3 = 100:1\text{ kPa}$  or  $\text{Ar}:\text{ND}_3 = 100:1\text{ kPa}$ . The reaction rate was calculated from the slope of the change in ammonia concentration until a conversion of  $10\%$  was reached as shown in the right panel.

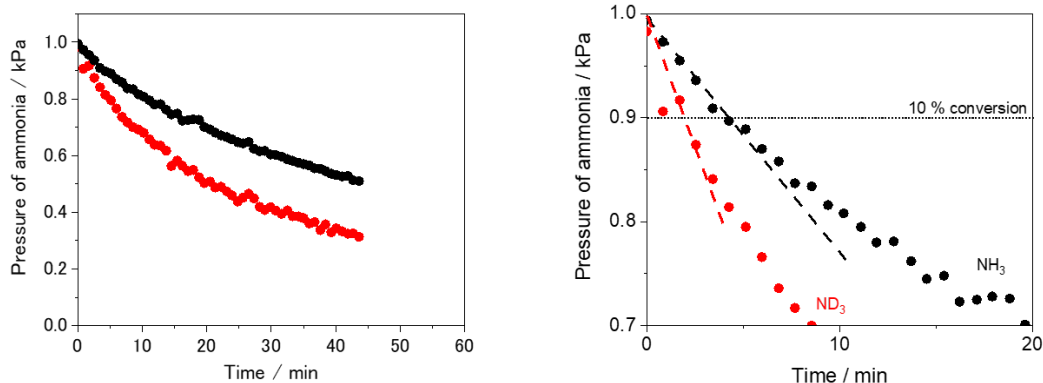

**Figure S8.** Time course measurement of NH<sub>3</sub> (black circle) and ND<sub>3</sub> (red line) decomposition at 300°C over supported Ru/CeO<sub>2</sub> (loaded Ru amount: 5 μg). The measurements were conducted in the recirculation batch reactor. The initial ratio of gas was Ar:NH<sub>3</sub> = 100:1 kPa or Ar/ND<sub>3</sub> = 100:1 kPa. The reaction rate was calculated from the slope of the change in ammonia concentration until a conversion of 10 % was reached as shown in the right panel.

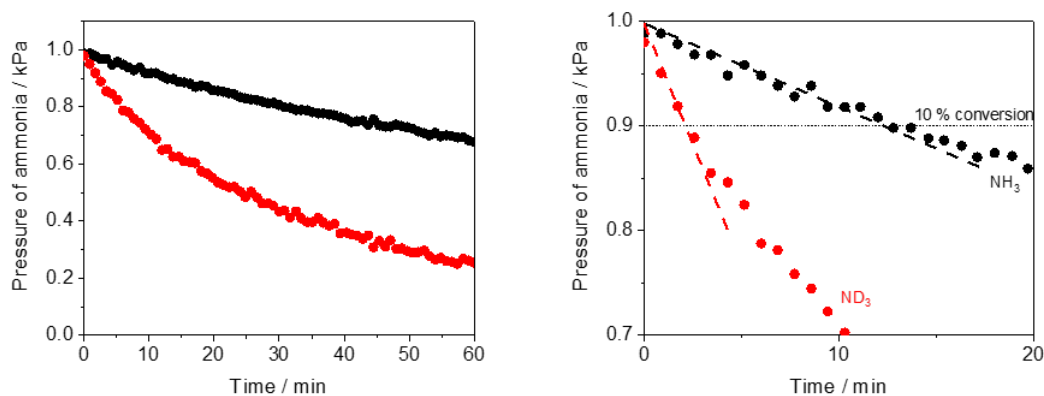

**Figure S9.** Time course measurement of NH<sub>3</sub> (black circle) and ND<sub>3</sub> (red line) decomposition at 350°C over supported Ru/CeO<sub>2</sub> (loaded Ru amount: 0.25 μg). The measurements were conducted in the recirculation batch reactor. The initial ratio of gas was Ar:NH<sub>3</sub> = 100:1 kPa or Ar/ND<sub>3</sub> = 100:1 kPa. The reaction rate was calculated from the slope of the change in ammonia concentration until a conversion of 10 % was reached as shown in the right panel.

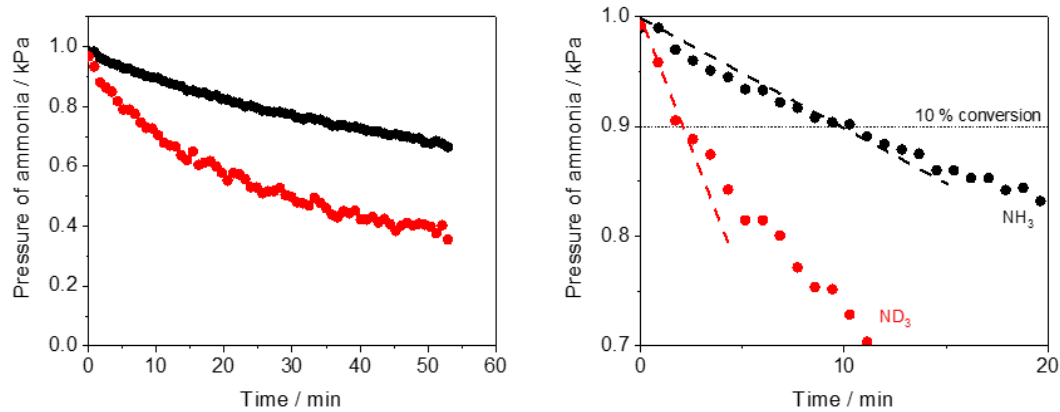

**Figure S10.** Time course measurement of NH<sub>3</sub> (black circle) and ND<sub>3</sub> (red line) decomposition at 400°C over supported Ru/CeO<sub>2</sub> (loaded Ru amount: 50 ng). The measurements were conducted in the recirculation batch reactor. The initial ratio of gas was Ar:NH<sub>3</sub> = 100:1 kPa or Ar/ND<sub>3</sub> = 100:1 kPa. The reaction rate was calculated from the slope of the change in ammonia concentration until a conversion of 10 % was reached as shown in the right panel.

## References

- 1 C. S. Kellner and A. T. Bell, *J. Catal.*, 1981, **67**, 175–185.
- 2 S. L. Leung, D. Hibbitts, M. García-Diéguez and E. Iglesia, *J. Phys. Chem. C Nanomater. Interfaces*, 2022, **126**, 3923–3938.
- 3 G. Wedler and G. Santelmann, *Ber. Bunsenges. Phys. Chem.*, 1971, **75**, 1026–1032.
- 4 K. Nakamoto, *Infrared spectra of inorganic and coordination compounds*, John Wiley & Sons, Nashville, 1970.
